# Supplementary material for: A meta-analysis of the effect of a dexamethasone intravitreal implant versus intravitreal anti-vascular endothelial growth factor treatment for diabetic macular edema
Source: Springer Nature journal article supplement (doi:10.1186/s12886-018-0779-1), 2018-05-21
Supplement: MOESM2 [file 15779032]

**Table S1**

**Search strategy on PubMed**

#1 Search (((macular edema) AND intravitreal dexamethasone implant) AND anti-VEGF) AND diabetes

#2 Search (((macular edema) AND diabetes) AND dexamethasone) AND anti-VEGF

#3 Search (((macular edema) AND diabetes) AND anti-VEGF) AND Ozurdex

**Table S2** GRADE of the evidence

| Quality assessment                                                                                                                                   |                   |                      |                          |                         |                      |                             | No of patients |         | Quality          | Importance |
|------------------------------------------------------------------------------------------------------------------------------------------------------|-------------------|----------------------|--------------------------|-------------------------|----------------------|-----------------------------|----------------|---------|------------------|------------|
| No of studies                                                                                                                                        | Design            | Risk of bias         | Inconsistency            | Indirectness            | Imprecision          | Other considerations        | OUTCOME        | Control |                  |            |
| <b>Mean BCVA at 6 months (follow-up mean 6 months; measured with: ETDRS; Better indicated by lower values)</b>                                       |                   |                      |                          |                         |                      |                             |                |         |                  |            |
| 3                                                                                                                                                    | randomised trials | serious <sup>1</sup> | no serious inconsistency | no serious indirectness | serious <sup>2</sup> | reporting bias <sup>3</sup> | 82             | 75      | ⊕000<br>VERY LOW | CRITICAL   |
| <b>Mean change in BCVA at 6 months and 12 months - at 6 months (follow-up mean 6 months; measured with: ETDRS; Better indicated by lower values)</b> |                   |                      |                          |                         |                      |                             |                |         |                  |            |
| 3                                                                                                                                                    | randomised trials | serious <sup>1</sup> | no serious inconsistency | no serious indirectness | serious <sup>2</sup> | reporting bias <sup>3</sup> | 82             | 75      | ⊕000<br>VERY LOW | CRITICAL   |

| Mean change in BCVA at 6 months and 12 months - at 12 months (follow-up 12 months; measured with: ETDRS; Better indicated by lower values) |                   |                         |                          |                         |                                     |                             |                    |                   |                  |           |
|--------------------------------------------------------------------------------------------------------------------------------------------|-------------------|-------------------------|--------------------------|-------------------------|-------------------------------------|-----------------------------|--------------------|-------------------|------------------|-----------|
| 2                                                                                                                                          | randomised trials | no serious risk of bias | no serious inconsistency | no serious indirectness | no serious imprecision <sup>2</sup> | reporting bias <sup>3</sup> | 227                | 224               | ⊕⊕⊕○<br>MODERATE | CRITICAL  |
| Mean CST at 6 months (follow-up 6 months; measured with: OCT; Better indicated by lower values)                                            |                   |                         |                          |                         |                                     |                             |                    |                   |                  |           |
| 3                                                                                                                                          | randomised trials | serious <sup>1</sup>    | serious <sup>4</sup>     | no serious indirectness | serious <sup>2</sup>                | reporting bias <sup>3</sup> | 82                 | 75                | ⊕○○○<br>VERY LOW | CRITICAL  |
| Mean change in CST at 6 months and 12 months - at 6 months (follow-up 6 months; measured with: OCT; Better indicated by lower values)      |                   |                         |                          |                         |                                     |                             |                    |                   |                  |           |
| 3                                                                                                                                          | randomised trials | serious <sup>1</sup>    | no serious inconsistency | no serious indirectness | serious <sup>2</sup>                | reporting bias <sup>3</sup> | 82                 | 75                | ⊕○○○<br>VERY LOW | CRITICAL  |
| Mean change in CST at 6 months and 12 months - at 12 months (follow-up 12 months; measured with: OCT; Better indicated by lower values)    |                   |                         |                          |                         |                                     |                             |                    |                   |                  |           |
| 2                                                                                                                                          | randomised trials | no serious risk of bias | serious <sup>4</sup>     | no serious indirectness | no serious imprecision              | reporting bias <sup>3</sup> | 209                | 208               | ⊕⊕○○<br>LOW      | CRITICAL  |
| Total serious adverse events (follow-up 12 months)                                                                                         |                   |                         |                          |                         |                                     |                             |                    |                   |                  |           |
| 3                                                                                                                                          | randomised trials | serious <sup>1</sup>    | no serious inconsistency | no serious indirectness | no serious imprecision              | reporting bias <sup>3</sup> | 47/218<br>(21.6%)  | 55/224<br>(24.6%) | ⊕⊕○○<br>LOW      | IMPORTANT |
|                                                                                                                                            |                   |                         |                          |                         |                                     |                             |                    | 30.4%             |                  |           |
| Elevation of IOP (follow-up 12 months)                                                                                                     |                   |                         |                          |                         |                                     |                             |                    |                   |                  |           |
| 4                                                                                                                                          | randomised trials | serious <sup>1</sup>    | no serious inconsistency | no serious indirectness | no serious imprecision              | reporting bias <sup>3</sup> | 101/264<br>(38.3%) | 20/257<br>(7.8%)  | ⊕⊕○○<br>LOW      | IMPORTANT |
|                                                                                                                                            |                   |                         |                          |                         |                                     |                             |                    | 3.3%              |                  |           |
| Adverse events: Cataract (follow-up 12 months)                                                                                             |                   |                         |                          |                         |                                     |                             |                    |                   |                  |           |
| 3                                                                                                                                          | randomised trials | serious <sup>1</sup>    | no serious inconsistency | no serious indirectness | no serious imprecision              | reporting bias <sup>3</sup> | 44/254<br>(17.3%)  | 15/247<br>(6.1%)  | ⊕⊕○○<br>LOW      | IMPORTANT |
|                                                                                                                                            |                   |                         |                          |                         |                                     |                             |                    | 7.1%              |                  |           |

<sup>1</sup> In one of the studies, the outcome assessors were not blinded for any outcomes

<sup>2</sup> Precision would be rated down by one level due to the small sample size ( $n < 400$ )

<sup>3</sup> Study size (small studies) or industry sponsorship or other conflicts of interest

<sup>4</sup> Consider the forest plot with included studies where the confidence intervals do not overlap. The p value for heterogeneity is less than 0.05, and  $I^2$  is more than 50%.
